# Supplementary material for: Identification of disinfection by-product precursors from the discharge of a coking wastewater treatment plant
Source: Royal Society of Chemistry journal article supplement (doi:10.1039/c5ra04930j), 2015-01-01
Supplement: c5ra04930j1.pdf [file c5ra04930j1.pdf]

Table S1 The structure of disinfection by-product (THMs and HANs) precursors

| Chemical group | Name                                           | Structure                                                                             |
|----------------|------------------------------------------------|---------------------------------------------------------------------------------------|
| nitriles       | 9-Anthracenecarbonitrile                       | 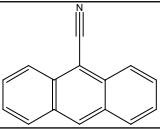   |
|                | 1-Naphthalenecarbonitrile                      |    |
|                | 1-Naphthyl acetonitrile                        |    |
|                | 2-Naphthylacetonitrile                         |    |
|                | 9-Cyanoanthracene                              |   |
|                | 3- phenyl, 2- propenyl cyanide                 |  |
|                | Isoquinoline nitrile                           |  |
|                | 9 - fluorene nitrile                           |  |
|                | [1,1'-Biphenyl]-2,2'-dicarbonitrile            |  |
|                | 2,6-Bis(1,1-dimethylethyl)-4-cyanomethylphenol |  |

|                          |                                                     |  |
|--------------------------|-----------------------------------------------------|--|
|                          | Benzonitrile, 3,5-bis(1,1-dimethylethyl)-4-hydroxy- |  |
| amine                    | 1-Naphthalenamine, N-phenyl-                        |  |
|                          | 2-Aminonaphthalene                                  |  |
|                          | 2 - acrylamide                                      |  |
|                          | 3 - butene amide                                    |  |
|                          | N,N-Dimethylacetamide;                              |  |
|                          | 6-Quinolinamine, 2-methyl-                          |  |
|                          | 9-Acridinamine                                      |  |
|                          | Cholestane, 4-(2-aminophenyl)-                      |  |
| nitrogenous heterocyclic | 2-methyl-5-phenyl- Pyridine                         |  |
|                          | Benzo[g]isoquinoline                                |  |
|                          | 1-(4-chlorophenyl)- 1H-Pyrrole                      |  |
|                          | 2-Azafluorene                                       |  |
|                          | Benzothiazole                                       |  |

|                                                                                          |                                                                                       |
|------------------------------------------------------------------------------------------|---------------------------------------------------------------------------------------|
| 2-methyl-6-Quinolinamine                                                                 | 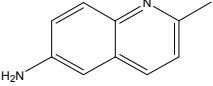   |
| 2,8-Dimethylquinoline                                                                    |    |
| 2,4,7-trimethyl-1,8-Naphthyridine                                                        |    |
| 9-Acridinamine                                                                           |    |
| 2-Thiophenecarboxaldehyde, 5-ethynyl-, (2,4-dinitrophenyl)hydrazone                      |    |
| 2-[2-(4-Methoxyphenyl)ethenyl]benzothiazole                                              |    |
| 4-Ethyl-1,2-dimethyl-7-tert-butyl-trans-decahydroquinolin-4-ol                           |   |
| Benzeneacetic acid, .alpha.-phenyl-.alpha.-[(trimethylsilyl)oxy]-, 3-quinuclidinyl ester |  |
| 1H-Indole, 2-(4-fluorophenyl)-5-methoxy-3-methyl-                                        |  |
| 5-Methyl-2-phenylindolizine                                                              |  |
| 2-methyl-5-phenyl- Pyridine                                                              |  |
| Benzo[g]isoquinoline                                                                     |  |
| 1-(4-chlorophenyl)- 1H-Pyrrole                                                           |  |

|             |                                                                     |                                                                                       |
|-------------|---------------------------------------------------------------------|---------------------------------------------------------------------------------------|
|             | 2-Azafluorene                                                       | 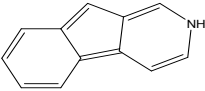   |
|             | Benzothiazole                                                       |    |
|             | 2,8-Dimethylquinoline                                               |    |
|             | 2,4,7-trimethyl-1,8-Naphthyridine                                   |    |
|             | 2-Thiophenecarboxaldehyde, 5-ethynyl-, (2,4-dinitrophenyl)hydrazone |    |
|             | 2-[2-(4-Methoxyphenyl)ethenyl]benzothiazole                         |    |
|             | 4-Ethyl-1,2-dimethyl-7-tert-butyl-trans-decahydroquinolin-4-ol      |   |
|             | 5-Methyl-2-phenylindolizine                                         |  |
| Hydrocarbon | Decane                                                              |  |
|             | Tridecane                                                           |  |
|             | Eicosane                                                            |  |
|             | Nonadecane                                                          |  |
|             | Heneicosane                                                         |  |
|             | Docosane                                                            |  |
|             | Dotriacontane                                                       |  |
|             | Hentriacontane                                                      |  |
|             | Tetratetracontane                                                   |  |
|             | Octacosane                                                          |  |

|                                  |                                                                                               |                                                                                       |
|----------------------------------|-----------------------------------------------------------------------------------------------|---------------------------------------------------------------------------------------|
|                                  | 5-Octadecene                                                                                  |    |
|                                  | Tricosane                                                                                     |    |
|                                  | Tetracosane                                                                                   |    |
|                                  | Eicosane                                                                                      |    |
|                                  | 3,3-dimethyl- Hexane                                                                          |    |
|                                  | 3-Ethyl-3-methylheptane                                                                       |    |
|                                  | 10-Methylnonadecane                                                                           |    |
|                                  | 2,6,10-trimethyl- Dodecane                                                                    |    |
|                                  | 2,4-Diphenyl-4-methyl-1-pentene                                                               |   |
|                                  | Benzene, 1,1'-(1,1,2,2-tetramethyl-1,2-ethanediyl)bis-                                        |  |
|                                  | 11-(1-ethylpropyl)- Heneicosane                                                               |  |
|                                  | 2-Bromotetradecane                                                                            |  |
|                                  | Phenanthrene, 1,2,3,4,4a,9,10,10a-octahydro-1,1,4a-trimethyl-7-(1-methylethyl)-, (4aS-trans)- |  |
|                                  | Benzene, 1,1'-(3-methyl-1-propene-1,3-diyl)bis-                                               |  |
|                                  | Squalene                                                                                      |  |
| polycyclic aromatic hydrocarbons | Naphthalene                                                                                   |  |

|        |                                                          |                                                                                       |
|--------|----------------------------------------------------------|---------------------------------------------------------------------------------------|
|        | 2-methyl- Naphthalene                                    | 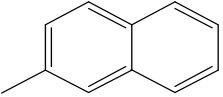   |
|        | 1-methyl- Naphthalene                                    |    |
|        | Biphenylene                                              |    |
|        | Acenaphthene                                             |    |
|        | Fluorene                                                 |    |
| Esters | Heptanoic acid, 4-octyl ester                            |    |
|        | Dodecanoic acid, methyl ester                            |  |
|        | 1,2-Benzenedicarboxylic acid, bis(2-methylpropyl) ester  |  |
|        | Hexadecanoic acid, methyl ester                          |  |
|        | 1,2-Benzenedicarboxylic acid, butyl 2-methylpropyl ester |  |
|        | 2-Methylbenzoic acid, 2-methoxyethyl ester               |  |
|        | Heptadecanoic acid, 16-methyl-, methyl ester             |  |

|               |                                                             |                                                                                       |
|---------------|-------------------------------------------------------------|---------------------------------------------------------------------------------------|
|               | Docosanoic acid, methyl ester                               | 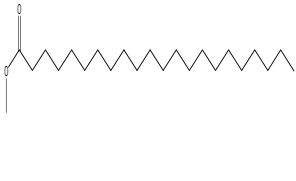   |
|               | 1,2-Benzenedicarboxylic acid, diisooctyl ester              |    |
|               | Terephthalic acid, di(4-octyl) ester                        |    |
|               | Phthalic acid, bis(7-methyloctyl) ester                     |    |
|               | Naphthalene-2,6-dicarboxylic acid, bis(4-hexylphenyl) ester |   |
| Phenols       | methylphenol                                                |  |
| Ketones       | 1-Hydroxy-2-pentanone                                       |  |
|               | 1,8-dimethoxy-9,10-Anthracenedione,                         |  |
| Organic acids |                                                             |  |
|               | Benzoic acid                                                |  |
|               |                                                             |  |
|               | Dodecanoic acid                                             |  |

|                                              |                                                                                       |
|----------------------------------------------|---------------------------------------------------------------------------------------|
| 1,4-Benzenedicarboxylic acid                 | 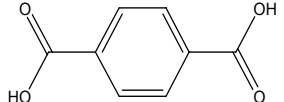   |
| Azelaic acid                                 |    |
| Tetradecanoic acid                           |    |
| 1,2-Benzenedicarboxylic acid                 |    |
| n-Pentadecanoic acid                         |    |
| 2-methylpropyl, 1,2-Benzenedicarboxylic acid |   |
| Hexadecanoic acid                            |  |
| 9,12-Octadecadienoic acid                    |  |
| trans-9-Octadecenoic acid                    |  |
| Octadecanoic acid                            |  |
